# Supplementary material for: Insights into high-pressure acclimation: comparative transcriptome analysis of sea cucumber Apostichopus japonicus at different hydrostatic pressure exposures
Source: PubMed Central journal article supplement (PMC6974979; doi:10.1186/s12864-020-6480-9), 2020-01-21

**Figure S1.** Results of KEGG enrichment.

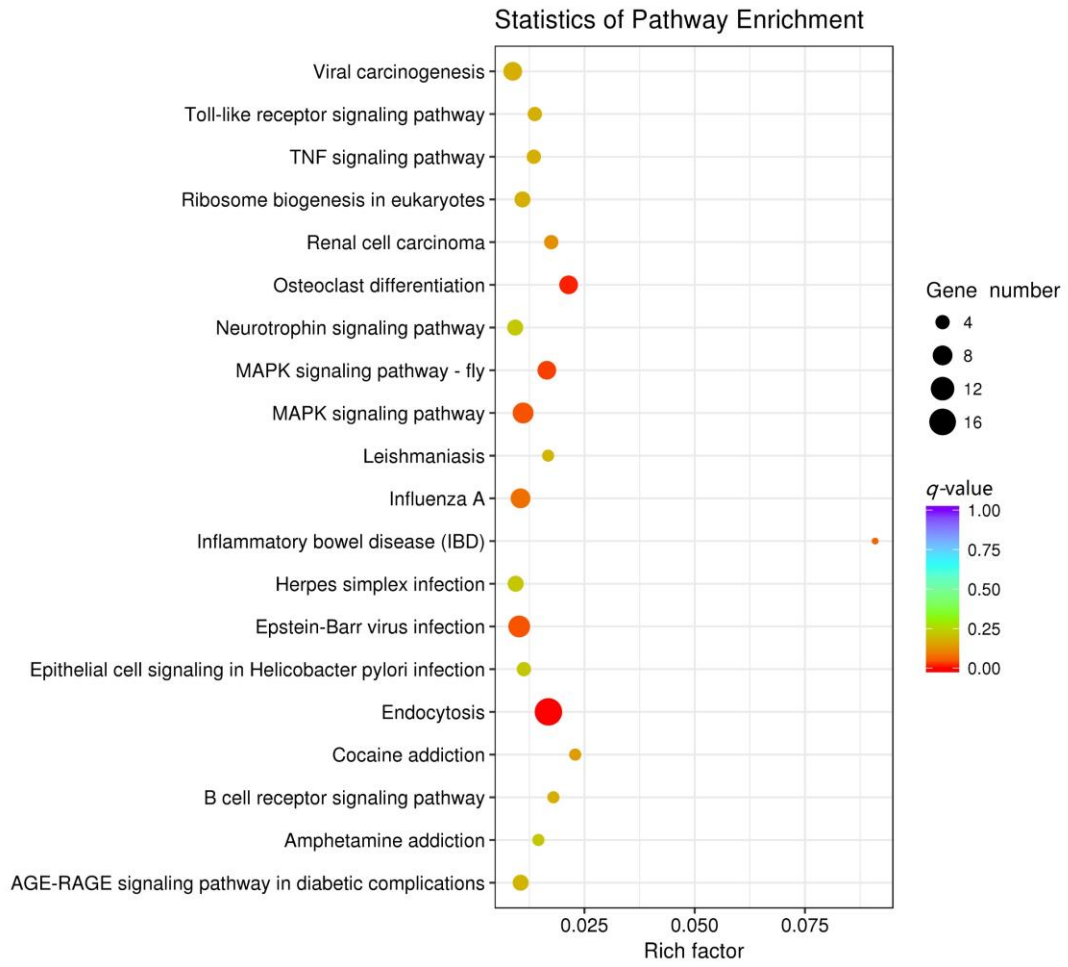

Supplement: 12864_2020_6480_MOESM1_ESM.pdf [file 12864_2020_6480_MOESM1_ESM.pdf]
